# Supplementary material for: Investigation of Hybrid Electrodes of Polyaniline and Reduced Graphene Oxide with Bio-Waste-Derived Activated Carbon for Supercapacitor Applications
Source: MDPI journal article supplement (doi:10.3390/polym16030421), 2024-02-02
Supplement: s1 [file s1]

## Supplementary Materials

# Investigation of Hybrid Electrodes of Polyaniline and Reduced Graphene Oxide with Bio-Waste-Derived Activated Carbon for Supercapacitor Applications

Imen Benchikh <sup>1</sup>, Abdelrahman Osama Ezzat <sup>2</sup>, Lilia Sabantina <sup>3,4,\*</sup>, Youcef Benmimoun <sup>5</sup> and Abdelghani Benyoucef <sup>5,\*</sup>

<sup>1</sup> Faculty of Science, University of Amar Telidji Laghouat, Laghouat 03000, Algeria; i.benchikh@lagh-univ.com

<sup>2</sup> Department of Chemistry, College of Sciences, King Saud University, Riyadh 11451, Saudi Arabia; aezzat@ksu.edu.sa

<sup>3</sup> Department of Apparel Engineering and Textile Processing, Berlin University of Applied Sciences-HTW Berlin, 12459 Berlin, Germany

<sup>4</sup> Department of Textile and Paper Engineering, Polytechnic University of Valencia (UPV), 03801 Alcoy, Spain

<sup>5</sup> Water Science and Technology Laboratory, University of Mustapha Stambouli Mascara, Mascara 29000, Algeria; youcef.benmimoun@univ-mascara.dz

\* Correspondence: Correspondence: lilia.sabantina@htw-berlin.de (L.S.); a.benyoucel@univ-mascara.dz (A.B.)

**Table S1.** The performance of graphene and PANi composites for supercapacitors.

| Electrode Materials (3-electrode) | Specific Capacitance (F·g <sup>-1</sup> ) | Current Densities (A·g <sup>-1</sup> ) | Cycle Life                                                   | References |
|-----------------------------------|-------------------------------------------|----------------------------------------|--------------------------------------------------------------|------------|
| PEDOT@WO <sub>3</sub> -GO         | 478.3                                     | 0.1                                    | 92.1% capacitance after 5000 cycles (50 mV·s <sup>-1</sup> ) | [1]        |
| Grapheme/PAni                     | 233                                       | 0.1                                    | //                                                           | [2]        |
| rGO/PAni                          | 464                                       | 0.62                                   | 13.5% capacitance after 2000 cycles (50 mV·s <sup>-1</sup> ) | [3]        |
| GO/PAni                           | 475                                       | 5.0                                    | 90% capacitance after 2000 cycles (10 mV·s <sup>-1</sup> )   | [4]        |
| PAni/GO                           | 442                                       | 1.0                                    | 83% capacitance after 2000 cycles (2 mV·s <sup>-1</sup> )    | [5]        |
| UGA/PANI                          | 538                                       | 1.0                                    | 74% capacitance after 1000 cycles (50 mV·s <sup>-1</sup> )   | [6]        |
| GO/PG/PAni                        | 793.7                                     | 1.0                                    | 80% capacitance after 1000 cycles (100 mV·s <sup>-1</sup> )  | [7]        |

## References

- Memou, C.H.; Bekhti, M.A.; Kiari, M.; Benyoucef, A.; Alelyani, M.; Alqahtani, M.S.; Alshihri, A.A.; Bakkour, Y. Fabrication and Characterization of a Poly(3,4-ethylenedioxythiophene)/Tungsten Trioxide-Graphene Oxide Hybrid Electrode Nanocomposite for Supercapacitor Applications. *Nanomaterials*. **2023**, *13*, 2664; <https://doi.org/10.3390/nano13192664>.
- Wang, D.W.; Li, F.; Zhao, J.; Ren, W.; Chen, Z.H.; Tan, J.; Wu, Z.S.; Gentle, I.; Lu, G.Q.; Cheng, H.M. Fabrication of Graphene/Polyaniline Composite Paper via In Situ Anodic Electropolymerization for High-Performance Flexible Electrode. *ACS Nano*. **2009**, *3*, 1745-1752. <https://doi.org/10.1021/nn900297m>.
- Wang, H.; Li Ma, Gan, M.; Zhou, T.; Sun, X.; Dai, W.; Wang, H.; Wang, S. Design and assembly of reduced graphene oxide/polyaniline/urchin-like mesoporous TiO<sub>2</sub> spheres ternary composite and its application in supercapacitors. *Composites Part B: Engineering*. **2016**, *92*, 405-412. <https://doi.org/10.1016/j.compositesb.2016.02.047>.
- Chang, T.W.; Lin, L.Y.; Peng, P.W.; Zhang, Y.X.; Huang, Y.Y. Enhanced electrocapacitive performance for the supercapacitor with tube-like polyaniline and graphene oxide composites. *Electrochim. Acta*. **2018**, *259*, 348-354. <https://doi.org/10.1016/j.electacta.2017.10.195>.

5. Li, Z.F.; Zhang, H.; Liu, Q.; Liu, Y.; Stanciu, L.; Xie, J. Covalently-grafted polyaniline on graphene oxide sheets for high performance electrochemical supercapacitors. *Carbon*. **2014**, *71*, 257-267. <https://doi.org/10.1016/j.carbon.2014.01.037>.
6. Wu, X.; Tang, L.; Zheng, S.; Huang, Y.; Yang, J.; Liu, Z.; Yang, W.; Yang, M. Hierarchical unidirectional graphene aerogel/polyaniline composite for high performance supercapacitors. *J. Power Sources*. **2018**, *397*, 189-195. <https://doi.org/10.1016/j.jpowsour.2018.07.031>.
7. Zhang, Y.; Si, L.; Zhou, B.; Zhao, B.; Zhu, Y.; Zhu, L.; Jiang, X. Synthesis of novel graphene oxide/pristine graphene/polyaniline ternary composites and application to supercapacitor. *Chem. Eng. J.* **2016**, *288*, 689-700. <https://doi.org/10.1016/j.cej.2015.12.058>.

**Disclaimer/Publisher's Note:** The statements, opinions and data contained in all publications are solely those of the individual author(s) and contributor(s) and not of MDPI and/or the editor(s). MDPI and/or the editor(s) disclaim responsibility for any injury to people or property resulting from any ideas, methods, instructions or products referred to in the content.
